# Supplementary material for: Imaging single-cell blood flow in the smallest to largest vessels in the living retina
Source: PubMed Central journal article supplement (PMC6516827; doi:10.7554/elife.45077), 2019-05-14
Supplement: elife-45077-supp1.pdf [file elife-45077-supp1.pdf]

**Number and Type of Mice Used in Each Figure**

| Figure Number                        | Species  | No. of mice used | Age (weeks) | Sex                                | Weight (g)             | Animal ID | Eye   | Date imaged (MM-DD-YYYY) |
|--------------------------------------|----------|------------------|-------------|------------------------------------|------------------------|-----------|-------|--------------------------|
| 1                                    | C57BL/6J | 1                | 31          | Male                               | 43                     | 01325     | Right | 09-27-2017               |
| 2                                    | C57BL/6J | 1                | 31          | Male                               | 43                     | 01325     | Right | 09-27-2017               |
| 3                                    | C57BL/6J | 1                | -           | -                                  | -                      | -         | Left  | 09-25-2014               |
| 4                                    | C57BL/6J | 1                | 31          | Male                               | 43                     | 01325     | Right | 09-27-2017               |
| 4 – supplement 1 A                   | C57BL/6J | 1                | 31          | Male                               | 43                     | 01325     | Right | 09-27-2017               |
| 4 – supplement 1 B,C                 | C57BL/6J | 1                | 15          | Male                               | 26.5                   | 01346     | Right | 09-28-2017               |
| 5 A,B                                | C57BL/6J | 1                | 31          | Male                               | 43                     | 01325     | Right | 09-27-2017               |
| 5 C                                  | C57BL/6J | 1                | -           | -                                  | -                      | -         | Left  | 09-25-2014               |
| 6                                    | C57BL/6J | 1                | 31          | Male                               | 43                     | 01325     | Right | 09-27-2017               |
| 7                                    | C57BL/6J | 1                | 37          | Male                               | 42.5                   | 01325     | Right | 11-08-2017               |
| 8                                    | C57BL/6J | 1                | -           | -                                  | -                      | -         | Left  | 09-25-2014               |
| 9                                    | C57BL/6J | 1                | 15          | Male                               | 26.5                   | 01346     | Right | 09-28-2017               |
| 10 A,B (without capillaries)         | C57BL/6J | 9                | 15-73       | 7 Males<br>1 Female<br>1 unknown   | 39.1 ± 6.5             | NA        | NA    | 09-25-2014 to 11-08-2017 |
| 10 C-F (only capillaries)            | C57BL/6J | 10               | 13-37       | 4 Males<br>3 Female<br>3 unknown   | 26.6 ± 4.0             | NA        | NA    | 03-31-2015 to 01-14-2016 |
| <b>Complete paper (i.e. Fig. 10)</b> | C57BL/6J | 19               | 13-73       | 11 Males<br>4 Females<br>4 unknown | 31.7 ± 8.1 (mean ± SD) | NA        | NA    | 09-25-2014 to 11-08-2017 |

**Supplementary Table 1:** The number and type of mice used in each figure. Our study is focused on 1) the method and 2) generating a novel dataset of hemodynamics in the healthy mouse. As such, Figures 1 to 9 are designed to show the method and analysis steps, algorithm validation and representative examples of measurements made. Therefore, these figures typically show one or a few vessels, from one mouse, unless otherwise mentioned in the table above. The population data across all mice imaged is shown in Figure 10. Population data are reported for mean velocity, flow, diameter and flux, across multiple mice, as quantified in the table above.
